# Supplementary material for: Untargeted metabolomics unveils an accumulation of flavonoids associated with the microbiome of low-performing sorghum
Source: Research Square preprint supplement (doi:10.21203/rs.3.rs-5926778/v1), 2025-04-24
Supplement: Supplementary file 1 [file 65c0ff4bf58de1a4ad44555d.xlsx]

## Sheet: Disc. Mets. LP
Metabolite	Vip Scores
NP-004020	2.36028
Œ≥-Aminobutyric acid	2.34377
D-Threonine	2.12823
D-Arginine	2.12066
D-Histidine	2.10625
Salicylic acid	2.04893
Pipecolic acid	2.0269
Sorbic acid	2.02603
(2S,3R,4S,5S,6R)-2-{3-hydroxy-5-[(E)-2-(4-hydroxy-3-methoxyphenyl)ethenyl]phenoxy}-6-(hydroxymethyl)oxane-3,4,5-triol	1.98466
D-Lysine	1.93403
NP-000919	1.92217
1-Aminocyclopropanecarboxylic acid	1.88237
(1R,2R,6R,9R)-2,11,11-trimethyl-3-oxotricyclo[4.3.2.0√Ça,√¢¬Å¬µ]undecane-9-carboxylic acid	1.88151
L-Methionine	1.85783
methyl 2-{9-hydroxy-1-methyl-5,10-dioxo-1H,3H,4H,5H,10H-naphtho[2,3-c]pyran-3-yl}acetate	1.83035
2-{[2-(3-cyano-2-pyridinyl)hydrazino]carbonyl}benzoic acid	1.79875
NP-001130	1.78827
Ciprofloxacin	1.7727
5-hydroxy-3-(4-hydroxyphenyl)-7-{[(2S,3R,4S,5S,6R)-3,4,5-trihydroxy-6-({[(2R,3R,4R,5R,6S)-3,4,5-trihydroxy-6-methyloxan-2-yl]oxy}methyl)oxan-2-yl]oxy}-4H-chromen-4-one	1.74562
Ornithine	1.74166
2,3-dimethoxy-5-(6,7,8-trimethoxy-3,4-dihydro-2H-1-benzopyran-3-yl)cyclohexa-2,5-diene-1,4-dione	1.74126
3-Hydroxy-3,5,5-trimethyl-4-(3-oxo-1-buten-1-ylidene)cyclohexyl Œ≤-D-glucopyranoside	1.72465
NP-001798	1.72129
3-Methoxycinnamic acid	1.72066
N6-Me-dA	1.6846
4-[1-(dimethylamino)ethylidene]-2-phenyl-1,3-oxazol-5(4H)-one	1.68235
(1R,9S)-11-(2-Pyrazinylcarbonyl)-3-[4-(trifluoromethoxy)phenyl]-7,11-diazatricyclo[7.3.1.02,7]trideca-2,4-dien-6-one	1.67013
Ferulic acid	1.66065
NP-015904	1.66021
Keracyanin	1.64915
4-Methylumbelliferyl-Œ±-D-glucopyranoside	1.64647
2-Hydroxycinnamic acid	1.64623
(3R,6aR,7S,12aS)-5,6,6a,7,8-pentahydroxy-3-methyl-1,2,3,4,5,6,6a,7,12,12a-decahydrotetraphene-1,12-dione	1.6434
D-Proline	1.64045
(2R,3S,4S,5R,6R)-5-{[(2S,3R,4R)-3,4-dihydroxy-4-(hydroxymethyl)oxolan-2-yl]oxy}-2-(hydroxymethyl)-6-(2-phenylethoxy)oxane-3,4-diol	1.62501
(2E)-3-(4-methoxy-2-{[(2S,3R,4S,5S,6R)-3,4,5-trihydroxy-6-(hydroxymethyl)oxan-2-yl]oxy}phenyl)prop-2-enoic acid	1.60758
6a,7,8,12a-tetrahydroxy-3-methyl-1,2,3,4,5,6,6a,7,12,12a-decahydrotetraphene-1,12-dione	1.60608
Isoferulic acid	1.59637
L-Proline	1.59554
N4-(3-chloro-4-fluorophenyl)-6-methylpyrimidine-2,4-diamine hydrochloride	1.58886
NP-017379	1.57203
Œ±-Linolenoyl ethanolamide	1.56081
NP-020078	1.54965
NP-016101	1.53668
(2R,3S,4S,5R,6R)-2-(hydroxymethyl)-6-(2-phenylethoxy)oxane-3,4,5-triol	1.53246
1-[2,4-Dihydroxy-3-(2-hydroxyethyl)-6-methoxyphenyl]-1-butanone	1.52552
2-Amino-1,3,4-octadecanetriol	1.51842
(3R,4S)-4,6,8-Trihydroxy-7-methoxy-3-methyl-3,4-dihydro-1H-isochromen-1-one	1.51321
1H-indene-3-carboxamide	1.51201
NP-019984	1.50296
NP-008952	1.5027
