# Supplementary material for: Untargeted metabolomics unveils an accumulation of flavonoids associated with the microbiome of low-performing sorghum
Source: Research Square preprint supplement (doi:10.21203/rs.3.rs-5926778/v1), 2025-04-24
Supplement: Supplementary file 2 [file 7844400405fe18e1b8f3b634.xlsx]

## Sheet: Disc. Mets. HP
Metabolite	Vip Score
D-Arginine	2.22032
13(S)-HOTrE	2.18799
2-[3-ethenyl-5-(methoxycarbonyl)-2-{[(2S,3R,4S,5S,6R)-3,4,5-trihydroxy-6-(hydroxymethyl)oxan-2-yl]oxy}-3,4-dihydro-2H-pyran-4-yl]acetic acid	2.18228
ARN1203	2.17334
NP-013663	2.16419
NP-021923	2.14326
(3S,4R)-3-(1-hydroxyhexyl)-4-(hydroxymethyl)oxolan-2-one	2.12233
Riboflavin	2.08705
NP-011223	2.07766
10-HDA	2.06246
NP-000587	2.03998
L-Carnitine	2.02398
L(-)-Pipecolinic acid	2.02363
NP-014287	2.02232
NP-017061	1.90949
NP-000919	1.90737
1-{4-hydroxy-2-oxo-6-[(1E)-prop-1-en-1-yl]-2H-pyran-3-yl}butane-1,2-dione	1.88954
9-Nitrooleate	1.88914
Pipecolic acid	1.88859
4-(3,4-dihydro-2H-1,5-benzodioxepin-7-ylamino)-4-oxobutanoic acid	1.8845
1-Aminocyclopropanecarboxylic acid	1.86373
(3aS,5aR,6R,9aS,9bS)-6-hydroxy-5a-methyl-3,9-dimethylidene-dodecahydronaphtho[1,2-b]furan-2-one	1.84817
D-Proline	1.84648
9-Oxo-10(E),12(E)-octadecadienoic acid	1.83441
4-oxo-4,5,6,7-tetrahydrobenzo[b]furan-3-carboxylic acid	1.8307
3-(4-Hydroxy-5-oxo-3-phenyl-2,5-dihydro-2-furanyl)propanoic acid	1.81828
N6,N6,N6-Trimethyl-L-lysine	1.81518
9S,13R-12-Oxophytodienoic acid	1.8119
3-(5,7-dimethoxy-4-oxo-4H-chromen-2-yl)propanoic acid	1.78413
N-Acetyl-L-methionine	1.78206
N-Acetyl-L-Proline	1.778
NP-001928	1.77559
NP-022035	1.77286
D-Lysine	1.76405
1,2-dihydroxyheptadec-16-yn-4-yl acetate	1.72976
Œ≤-Alanine	1.72548
L-Proline	1.71834
NP-012228	1.7076
NP-019984	1.69871
ethyl 3-amino-1-[6-(4-methylpiperidino)pyridazin-3-yl]-1H-pyrazole-4-carboxylate	1.69582
(¬±)-Abscisic acid	1.67944
D-Leucine	1.67434
NP-020521	1.65955
1,5-Anhydro-2-O-(6-O-benzoyl-Œ±-L-galactopyranosyl)-D-glucitol	1.65458
Kinetin	1.6493
(2R)-2-[(2R,5S)-5-[(2S)-2-hydroxybutyl]oxolan-2-yl]propanoic acid	1.63882
DL-Stachydrine	1.63689
Œ±-Eleostearic acid	1.62765
2-[(2S,3R,4S,5R)-3,4-Dihydroxy-5-{[(isopropylcarbamoyl)amino]methyl}tetrahydro-2-furanyl]-N-(3-pyridinylmethyl)acetamide	1.62494
Acetyl-L-carnitine	1.61468
5-(4-carboxy-3-methylbutyl)-5,6,8a-trimethyl-3-oxo-3,4,4a,5,6,7,8,8a-octahydronaphthalene-1-carboxylic acid	1.60833
2,3-Dihydroxybenzoic acid	1.58872
D-(-)-Fructose	1.57828
Sinapic acid	1.57727
NP-020921	1.57502
Albiflorin-3	1.57078
NP-018660	1.55751
Allantoin	1.55726
O-Acetyl-L-carnitine	1.55489
5,6,7-Trimethoxy-2H-chromen-2-one	1.55153
5-Phenylcyclohexane-1,3-dione	1.55031
Indole-3-acrylic acid	1.54979
N-Acetylneuraminic acid	1.54386
NP-000465	1.53678
NP-003433	1.53625
NP-013210	1.53275
4-hydroxy-7-methyl-2-(2-{[3,4,5-trihydroxy-6-(hydroxymethyl)oxan-2-yl]oxy}propan-2-yl)-2H,3H,5H-furo[3,2-g]chromen-5-one	1.52509
(1R,9S)-11-(2-Pyrazinylcarbonyl)-3-[4-(trifluoromethoxy)phenyl]-7,11-diazatricyclo[7.3.1.02,7]trideca-2,4-dien-6-one	1.51939
NP-013326	1.5143
Sakuranin	1.50352
5-[4-(3-hydroxy-4-methoxyphenyl)-hexahydrofuro[3,4-c]furan-1-yl]-2-methoxyphenol	1.50025
