# Supplementary material for: Untargeted metabolomics unveils an accumulation of flavonoids associated with the microbiome of low-performing sorghum
Source: Research Square preprint supplement (doi:10.21203/rs.3.rs-5926778/v1), 2025-04-24
Supplement: Supplementary file 3 [file dc79da58b80c7ea038842f9d.docx]

SUPPLEMENTARY MATERIALS

|  | High-performing | Low-performing |
| --- | --- | --- |
| Mean degree of flavonoids | 1.31 | 7.98 |
| Total number of nodes | 388 | 500 |
| Modularity score | 0.43 | 0.28 |
| Mean degree of metabolites | 1.93 | 5.16 |
| Mean degree of OTUs | 25.8 | 39.47 |

**Supplementary Table S1.** **Flavonoids exhibit a higher degree of connectivity in the low-performing network**. Characteristics of each metabolite-OTU network for each performance class.


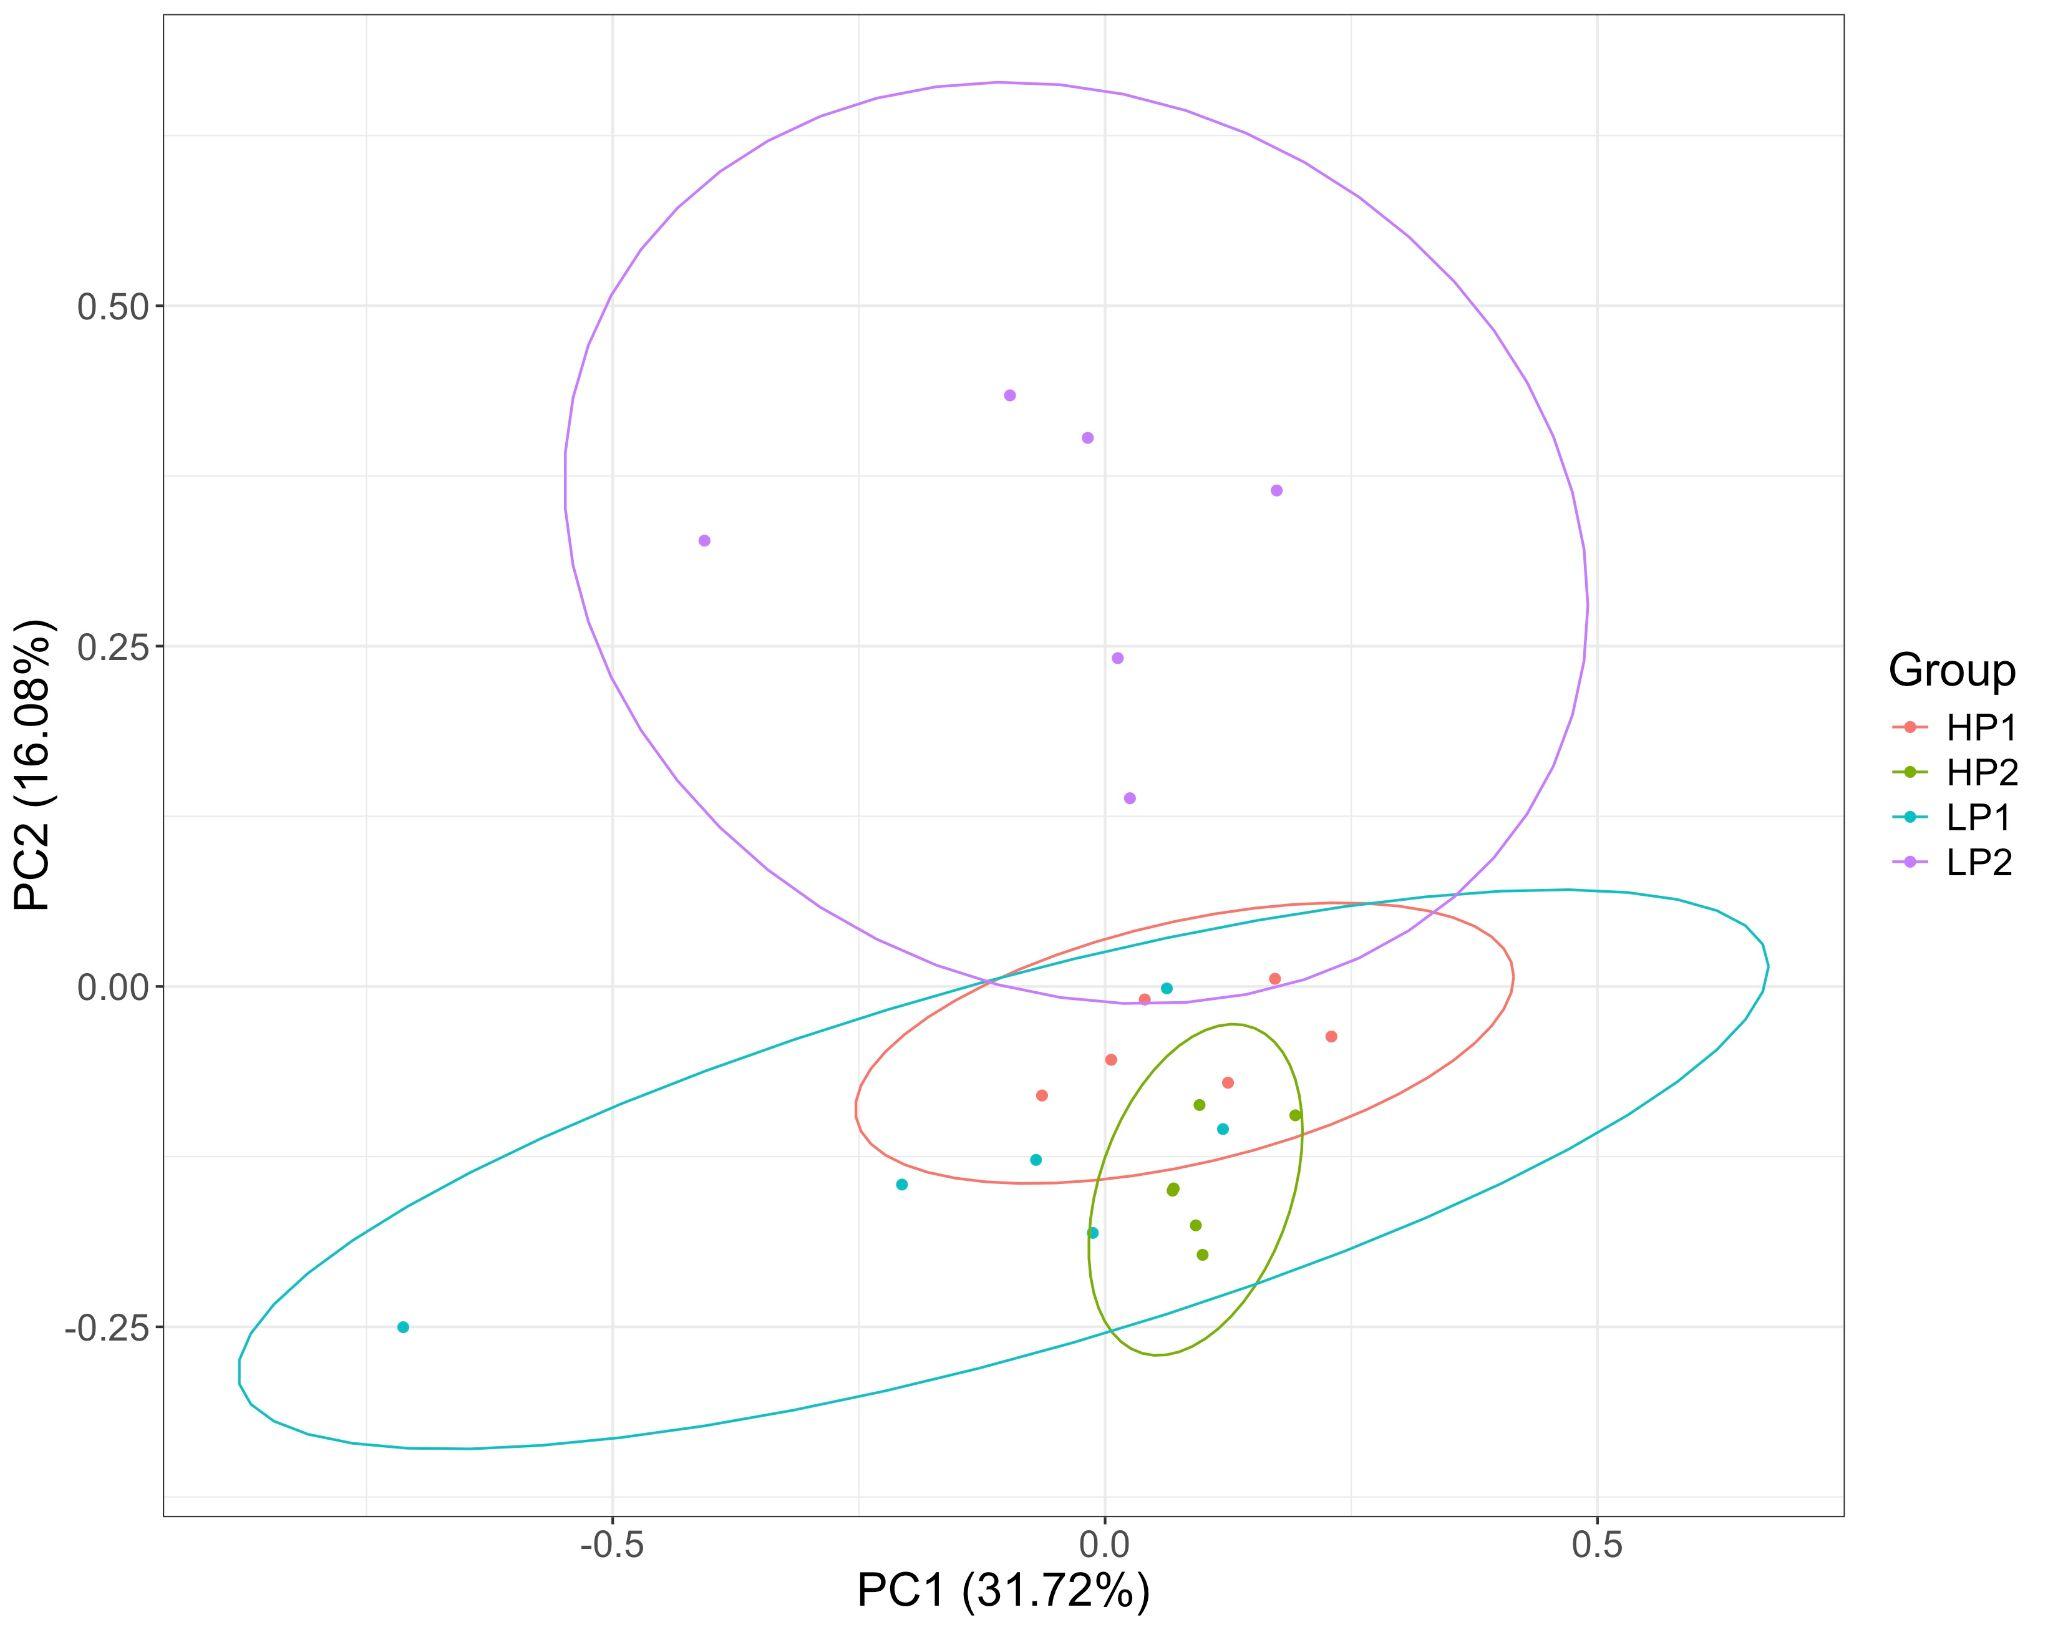


**Supplementary Fig. S1**. **Non-polar metabolites in the root metabolome of sorghum also differ by genotype.** The sorghum root metabolome differed significantly as a function of plant genotype (PERMANOVA, *P* ≤0.001), as visualized with a principal component analysis (PCA) of 192 log2-transformed MSI Level 2 metabolites from the HILIC dataset.


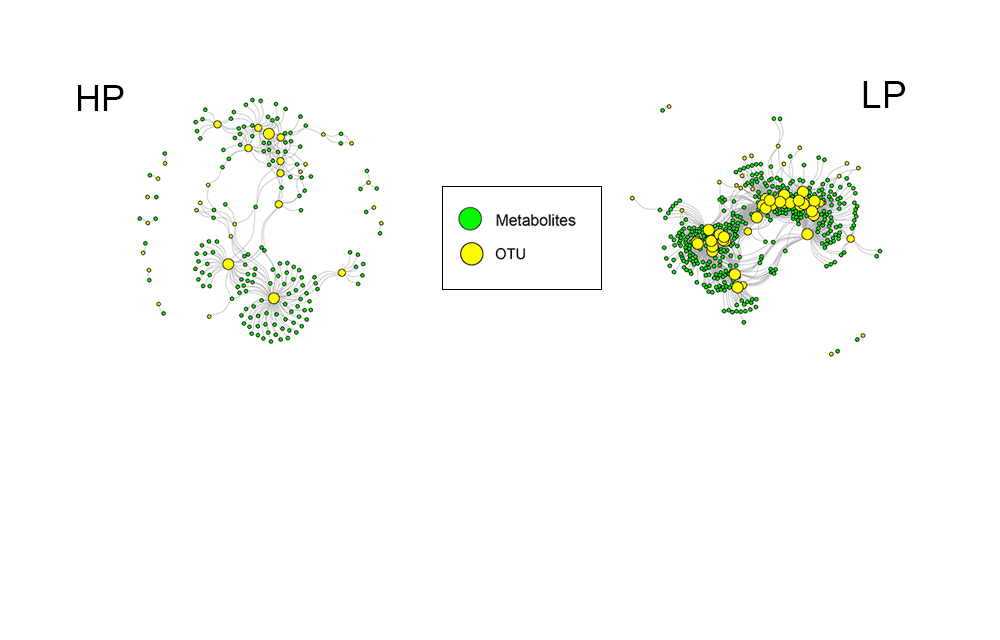


**Supplementary Fig. S2.** **The metabolite-OTU network of higher-performers differs from that of lower-performers, regardless of method.** Alternative network analysis via significant (FDR adjusted *P* ≤0.05) Spearman’s correlations (>0.6) reveal the same broad patterns in modularity and degree.
